# Supplementary material
Source: PubMed Central journal article supplement (PMC10121976)
Supplement: 13311_2022_1337_MOESM1_ESM.pdf [file 13311_2022_1337_MOESM1_ESM.pdf]

## Supplemental Fig. 1

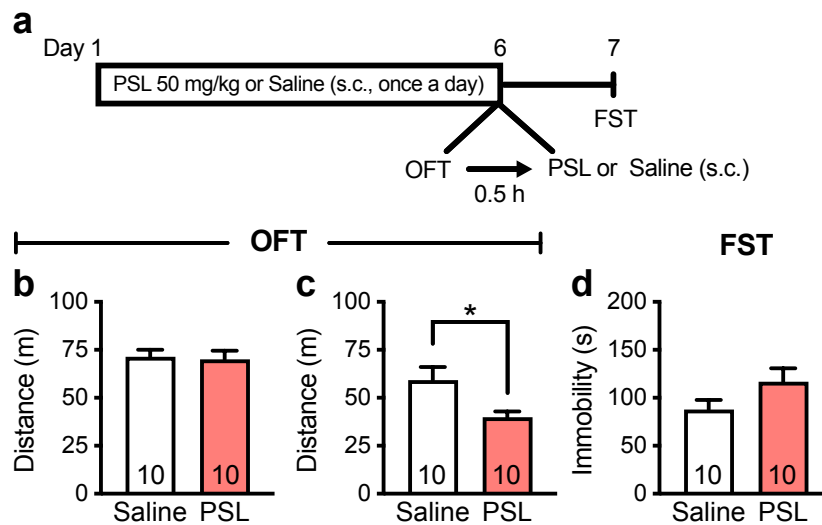

Repeated PSL induced anxiety-like behavior in the OFT, but not depression-like behavior in the FST in female ICR mice. **(a)** Experimental timeline for PSL treatment (50 mg/kg, s.c., once a day for 6 days), and behavioral testing. **(b, c)** Effects of PSL on total distance traveled (**b**,  $t_{18} = 0.221$ ,  $p = 0.828$ ) and time in center (**c**,  $t_{18} = 2.59$ ,  $p = 0.0185$ ) in the OFT. **(d)** Effects of PSL on immobility in the FST ( $t_{18} = 1.69$ ,  $p = 0.108$ ). Data are expressed as mean  $\pm$  SEM. \* $p < 0.05$  (Student's  $t$ -test).
